# Supplementary material
Source: PubMed Central journal article supplement (PMC6824936)
Supplement: NIHMS1043222-supplement-Supp_info.pdf [file NIHMS1043222-supplement-Supp_info.pdf]

# **Supporting Information: Simultaneous Multislice MRI Thermometry with a Single Coil Using Incoherent Blipped-Controlled Aliasing**

Kristin Quah<sup>1,2</sup>, Megan Poorman<sup>3</sup>, Steven Allen<sup>4</sup> and William A Grissom<sup>1,2</sup>

July 10, 2019

<sup>1</sup>Vanderbilt University Institute of Imaging Science

<sup>2</sup>Department of Biomedical Engineering, Vanderbilt University, Nashville, TN, United States

<sup>3</sup>Department of Physics, University of Colorado, Boulder, CO, United States

<sup>4</sup>Department of Biomedical Engineering, University of Virginia, Charlottesville, VA, United States

Corresponding author:

William Grissom

Vanderbilt University Institute of Imaging Science

1161 21st Avenue South

Medical Center North, AA-3114

Nashville, TN 37235 USA

E-mail: will.grissom@vanderbilt.edu

Twitter: @wgrissom

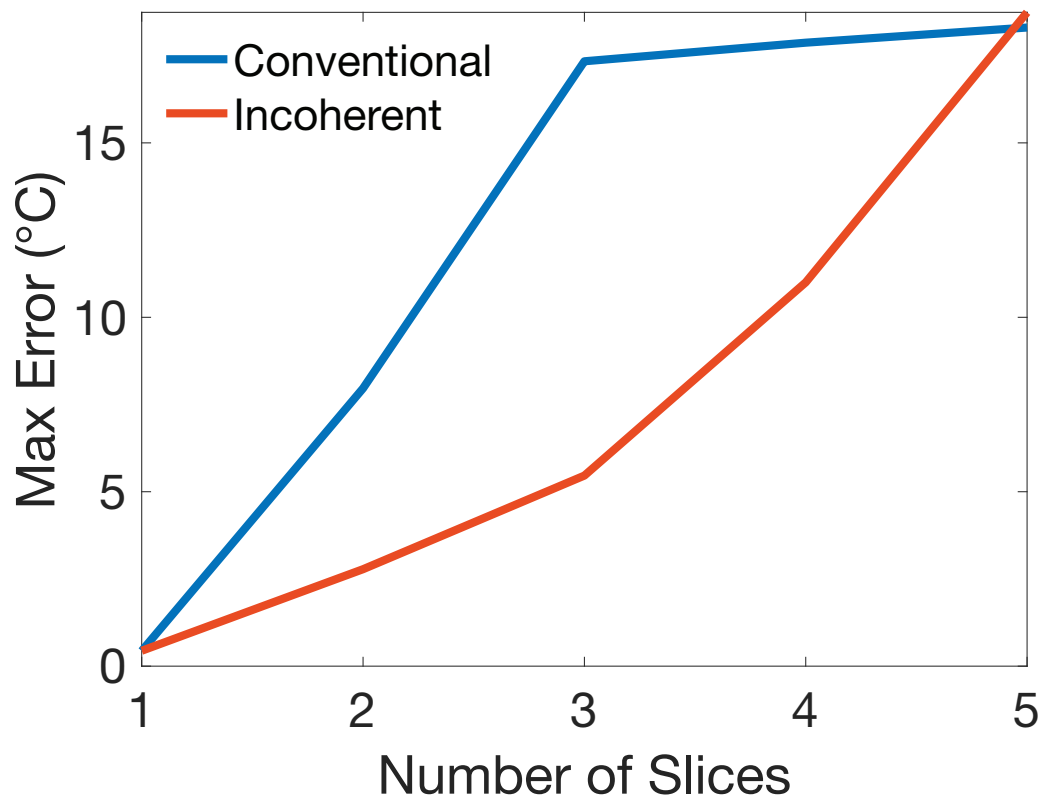

Supporting Information Figure S1: Simulated reconstructed maximum temperature error versus number of slices, for conventional- and incoherent-controlled aliasing SMS. For each point, maximum error was calculated across the reconstructed slices and across the 50 k-space phase permutations.

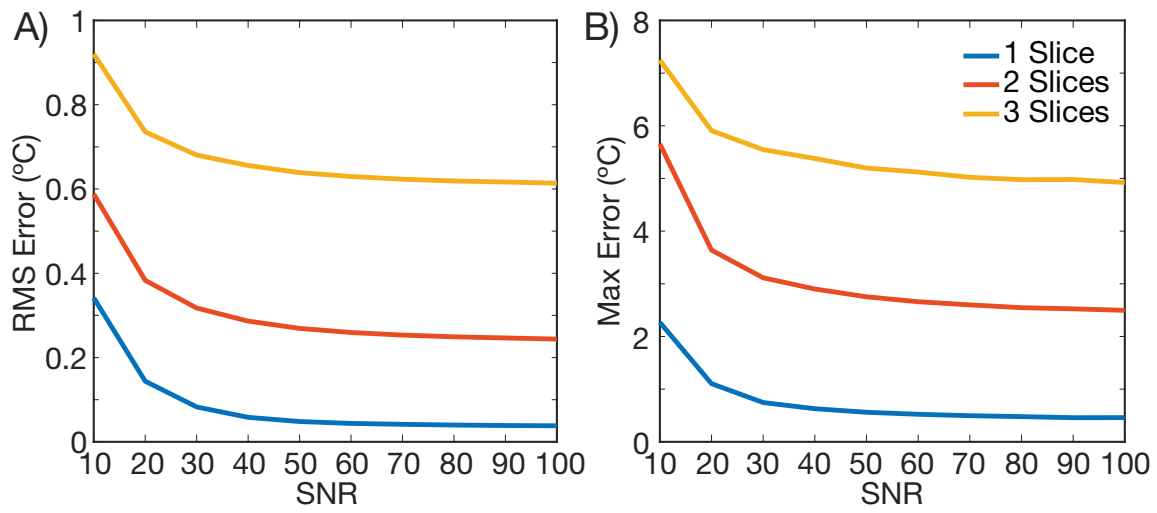

Supporting Information Figure S2: Simulated reconstructed RMS and maximum temperature error versus SNR, for one slice and for two and three simultaneous slices with incoherent-controlled aliasing. For each point, maximum error was calculated across the reconstructed slices and across the 50 k-space phase permutations.

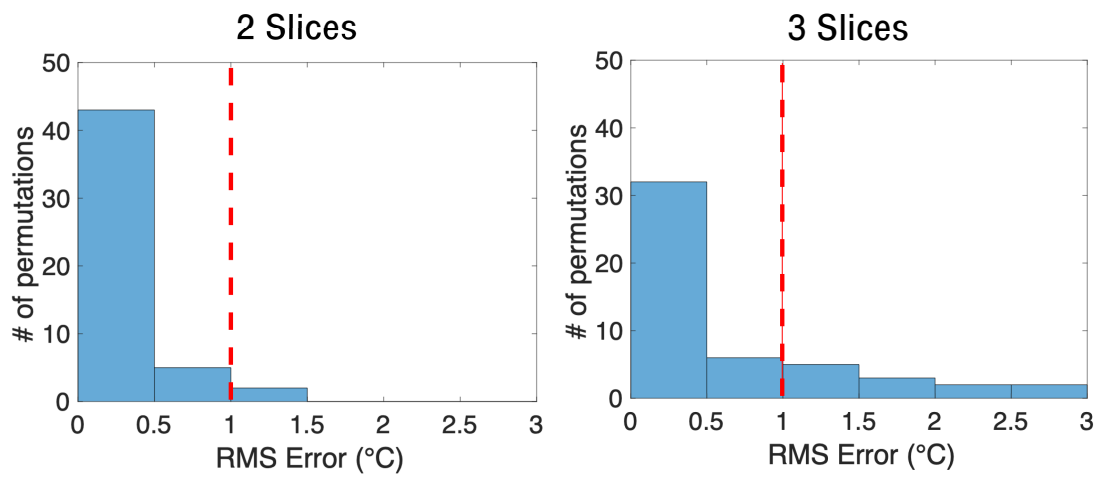

Supporting Information Figure S3: RMS errors of the 50 different random k-space slice-phase permutations used in the two- and three-slice simulations. The red line indicates the 1 °C acceptable error threshold.

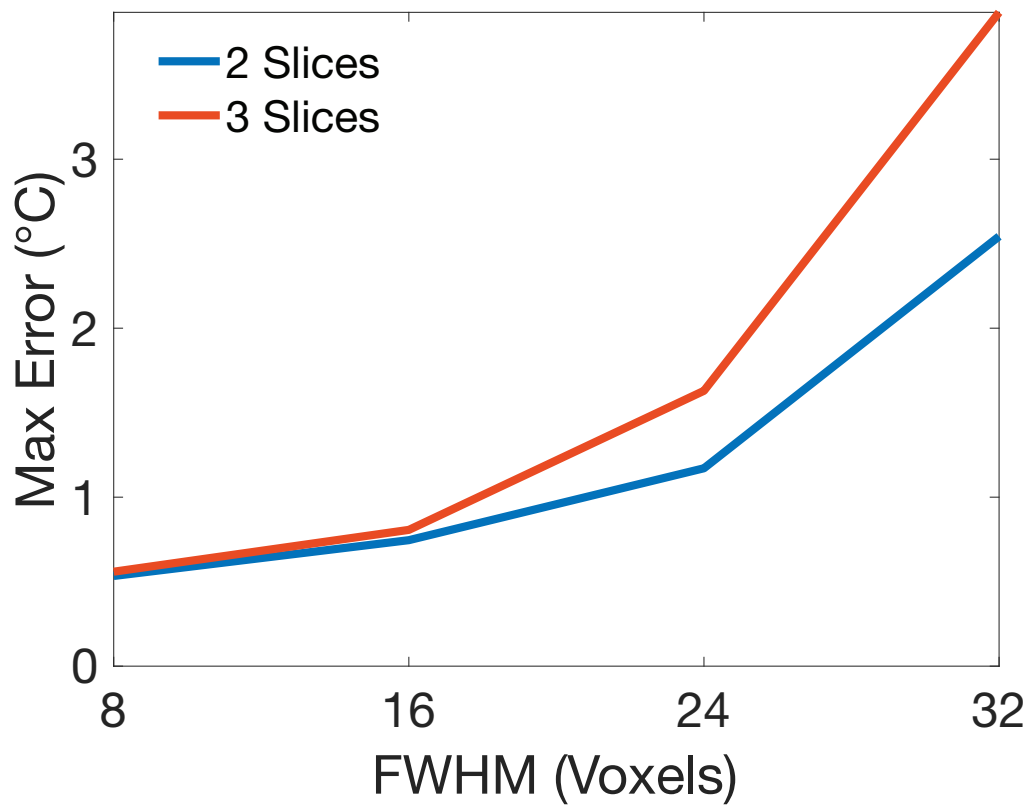

Supporting Information Figure S4: Simulated reconstructed maximum temperature error versus hot spot size, for 2 and 3 slices. For each point, maximum error was calculated across the reconstructed slices and across the 50 k-space phase permutations.

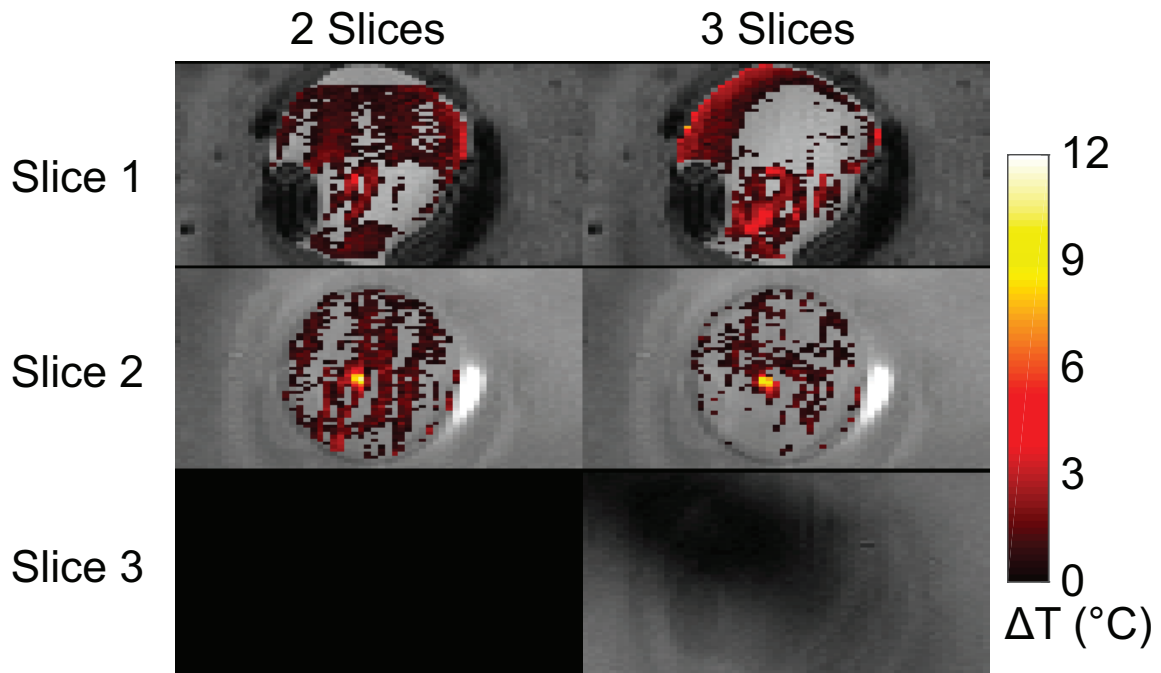

Supporting Information Figure S5: Axial phantom temperature maps in each slice at peak heat (30 seconds) for two- and three-slice SMS, when water bath signal changes are ignored in the reconstruction. Temperature rises above  $0.1^{\circ}\text{C}$  are overlaid on baseline images that are cropped to the phantom.
